# Supplementary material for: Genomic Amplification of UBQLN4 Is a Prognostic and Treatment Resistance Factor
Source: MDPI journal article supplement (doi:10.3390/cells11203311), 2022-10-21
Supplement: s1 [file s1]

# Genomic Amplification of *UBQLN4* Is a Prognostic and Treatment Resistance Factor

Yuta Kobayashi <sup>1</sup>, Matias A. Bustos <sup>1</sup>, Yoshiaki Shoji <sup>1</sup>, Ron D. Jachimowicz <sup>2,3,4,5</sup>, Yosef Shiloh <sup>6</sup> and Dave S. B. Hoon <sup>1,\*</sup>

## Supplementary Materials

### Supplementary Figures

Figure S1. Comparison of *UBQLN1-4* mRNA expression fold-change between tumor and normal/adjacent normal tissues in different cancers.

Figure S2. Survival analysis according to *UBQLN4* mRNA levels in Stage III/IV patients.

Figure S3. Genomic alterations and methylation status of *UBQLN4* gene.

Figure S4. Post-transcriptional regulation of *UBQLN4* mRNA levels.

Figure S5. Distributions of DNA copy number of the *UBQLN1-3* genes in different solid tumors in the TCGA database.

Figure S6. Copy number alterations in adjacent normal tissues in TCGA dataset

Figure S7. *UBQLN4* mRNA levels in relation to AJCC stage and histopathology subtypes in different cancer types.

Figure S8. *UBQLN4* mRNA levels in relation to AJCC stage in different cancer types.

Figure S9. *UBQLN4* DNA copy number in relation to AJCC stage and histopathology subtypes in different cancer types.

Figure S10. Survival analysis according to *UBQLN4* DNA copy number in Stage I/II patients.

Figure S11. Associations between *UBQLN4* mRNA levels and Cisplatin and Olaparib responses in *BRCA1/2* wild-type ovarian cancer cell lines.

### Supplementary Table

Table S1. Summary of *UBQLN4* analysis using The Cancer Genome Atlas (TCGA) and The

**Genotype-Tissue Expression (GTEx)**

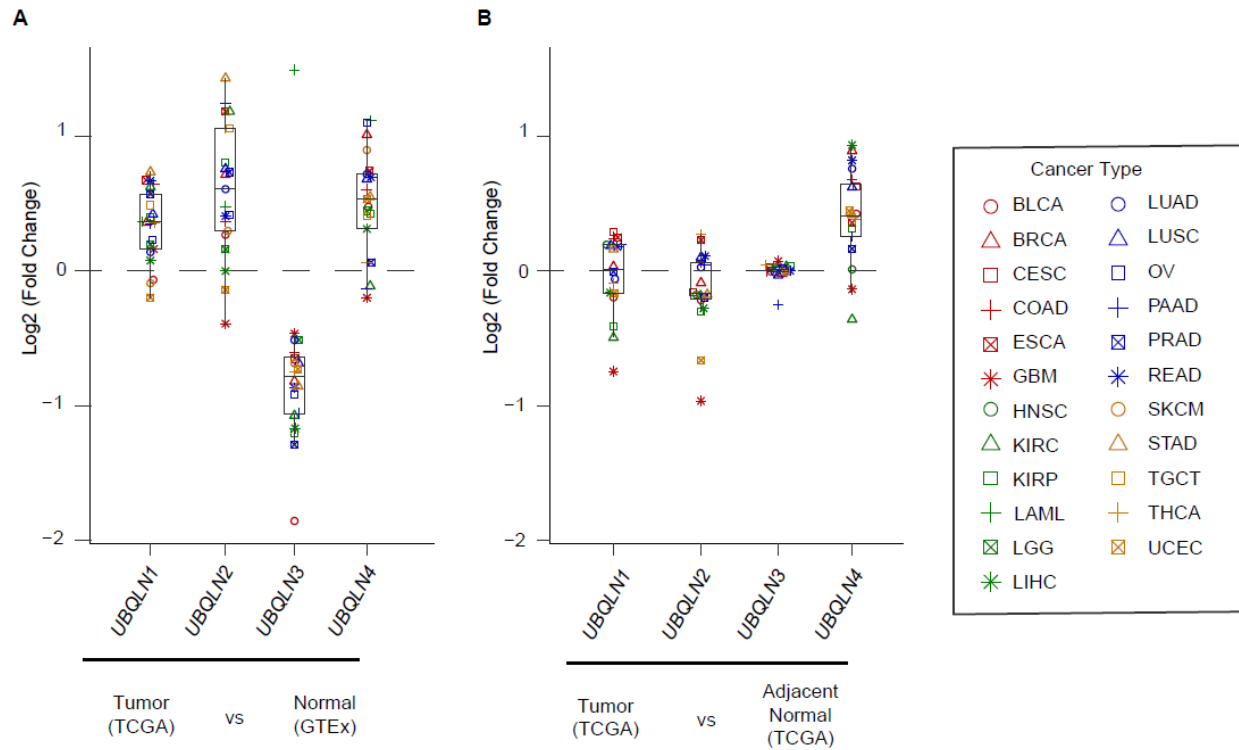

**Figure S1. Comparison of *UBQLN1-4* mRNA expression fold-change between tumor and normal/adjacent normal tissues in different cancers**

**A.** Comparison of mRNA levels between tumor (TCGA) and normal tissues (GTEx). **B.** Comparison of mRNA levels between tumor (TCGA) and adjacent normal tissues (TCGA). Each cancer type was represented with a symbol as indicated in the Figure.

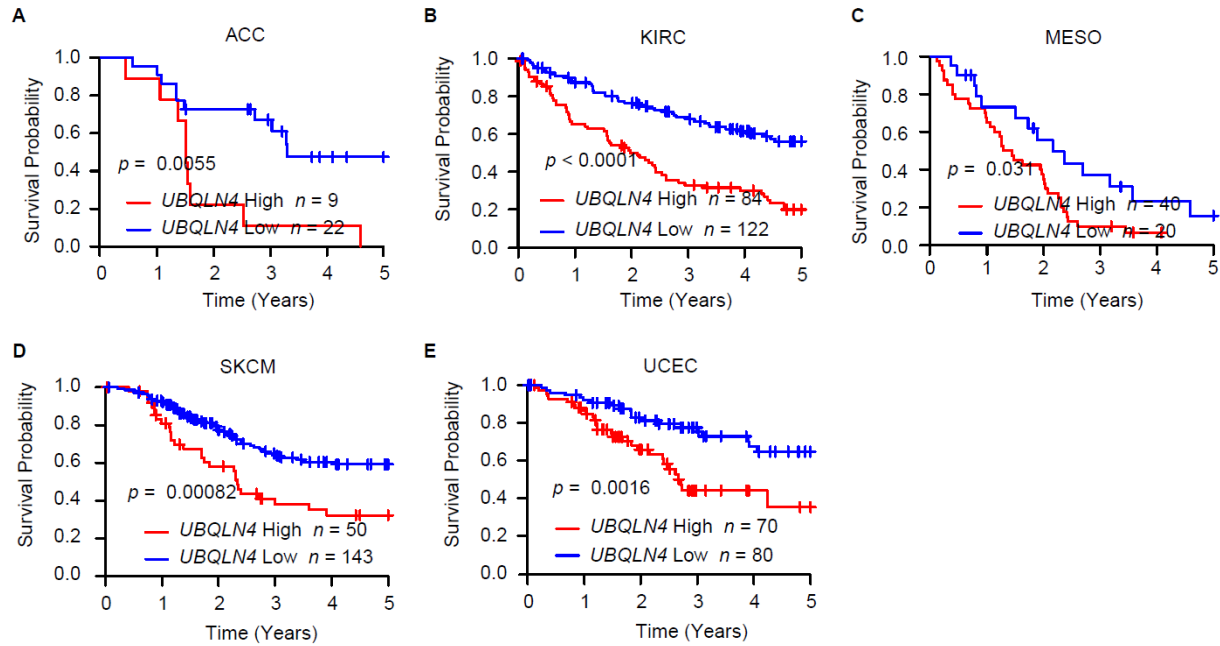

**Figure S2. Survival analysis according to *UBQLN4* mRNA levels in Stage III/IV patients**

**A-E.** Kaplan-Meier curves for ACC, KIRC, MESO, SKCM, and UCEC patients according to *UBQLN4* mRNA expression in Stage III/IV using TCGA datasets. ACC: Adrenocortical Carcinoma, KIRC: Kidney Renal Clear Cell Carcinoma, MESO: Mesothelioma, SKCM: Skin Cutaneous Melanoma, UCEC: Uterine Corpus Endometrial Carcinoma.

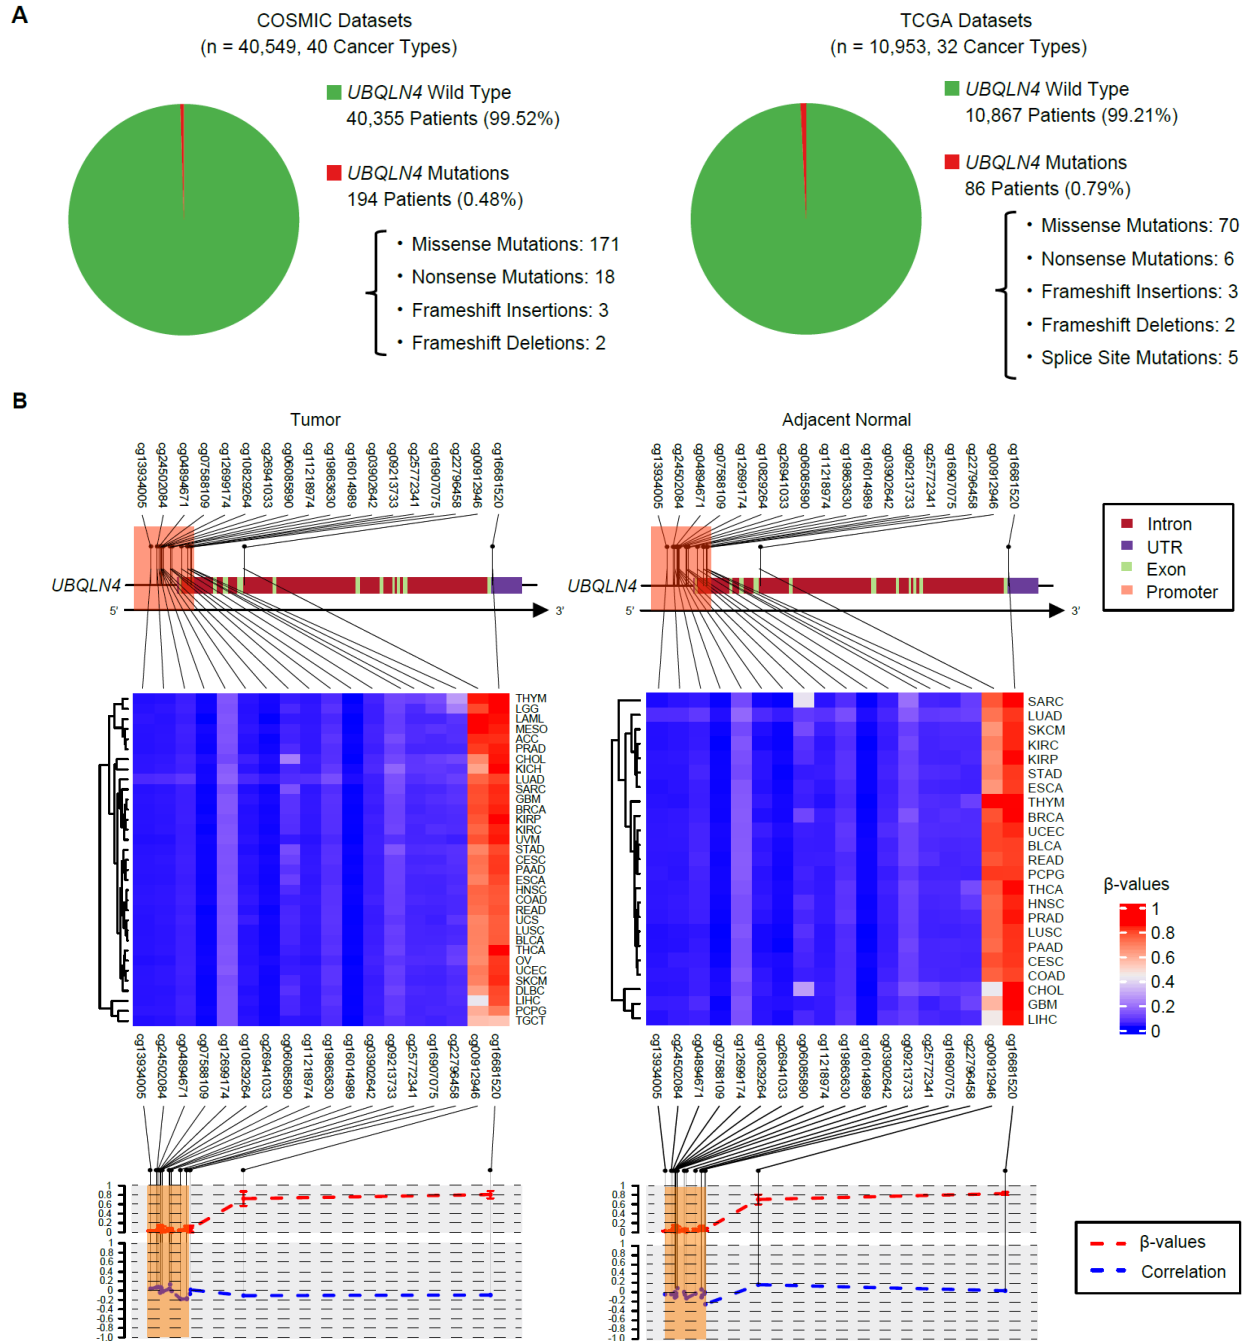

**Figure S3. Genomic alterations and methylation status of *UBQLN4* gene**

**A.** Pie chart showing the percentage of *UBQLN4* mutations in pan-cancer cases of the Catalogue of Somatic Mutations in Cancer (COSMIC) (Left,  $n = 40,355$ ) and TCGA (Right,  $n = 10,953$ ) databases. **B.** DNA methylation status of *UBQLN4* gene in tumor tissues (Left) and adjacent normal tissues (Right) in the TCGA pan-cancer datasets. (Top) *UBQLN4* gene structure, promoter regions, and methylation probe sites in HM450K methylation dataset. (Middle) Mean beta values at each probe site in each cancer type were shown

as a heatmap. (Bottom) The mean beta values (red dotted line) and Pearson's correlation (blue dotted line) between beta values for each probe and *UBQLN4* mRNA levels in pan-cancer were calculated.

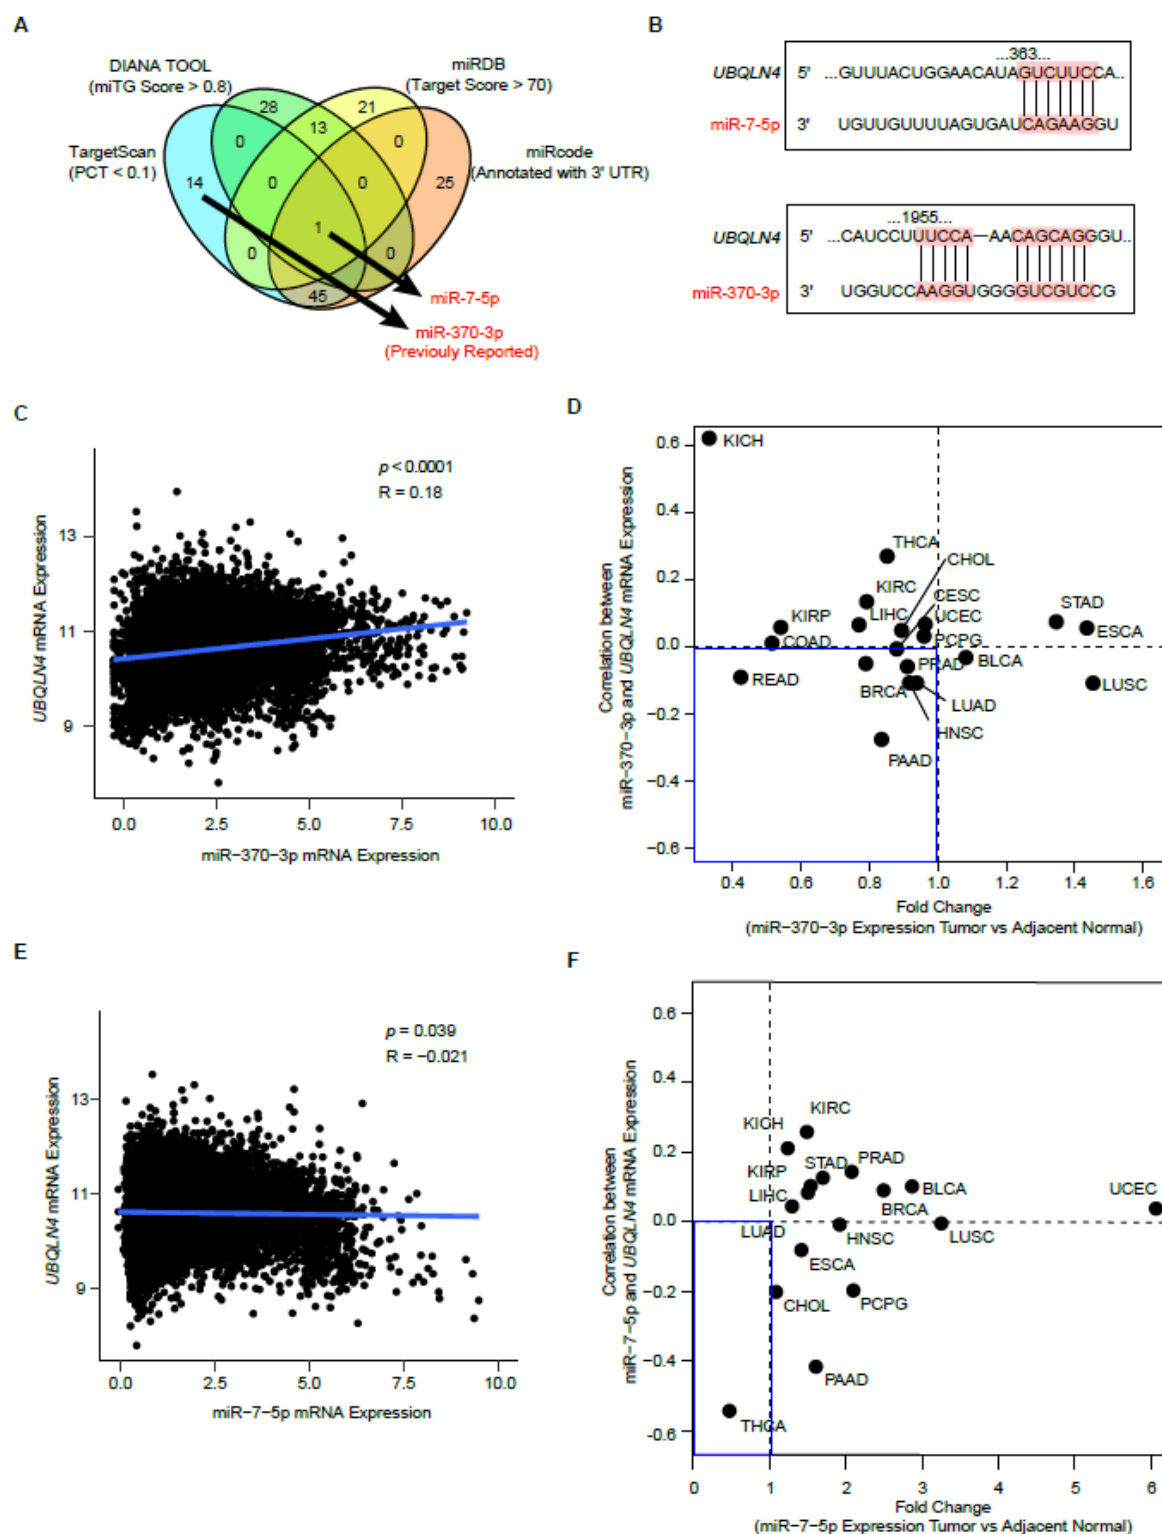

**Figure S4. Post-transcriptional regulation of *UBQLN4* mRNA levels**

**A.** Venn diagram showing putative miRNAs that target *UBQLN4* mRNA predicted by four different computational tools (TargetScan, miRcode, DIANA TOOL, and miRDB). **B.** miR-370-3p and miR-7-5p

sequences aligned with *UBQLN4* sequences. **C.** Pearson's correlation between miR-370-3p levels and *UBQLN4* mRNA levels in pan-cancer in TCGA datasets. **D.** Statistical evaluation of miR-370-3p in TCGA datasets. Each cancer type is represented as a dot. The horizontal coordinate indicates the fold change in miR-370-3p levels in tumor tissues compared to adjacent normal tissues. The vertical coordinate indicates the Pearson correlation coefficient between miR-370-3p and *UBQLN4* mRNA levels. **E.** Pearson's correlation between miR-7-5p levels and *UBQLN4* mRNA levels in pan-cancer in TCGA datasets. **F.** Statistical evaluation of miR-7-5p in TCGA datasets. Each cancer type is represented as a dot. The horizontal coordinate indicates the fold change in miR-7-5p levels in tumor tissues compared to adjacent normal tissues. The vertical coordinate indicates the Pearson correlation coefficient between miR-7-5p and *UBQLN4* mRNA levels.



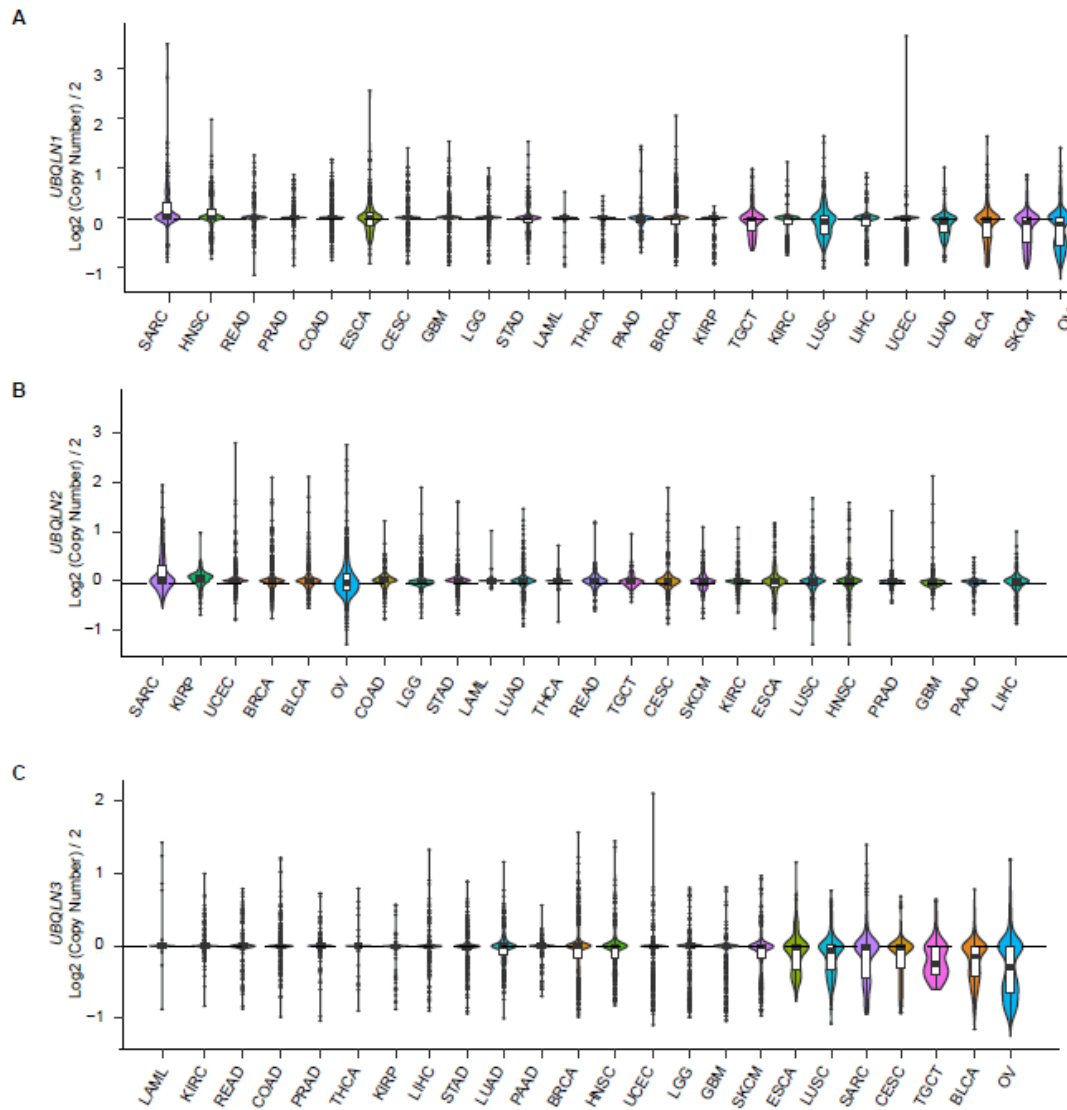

**Figure S5. Distributions of DNA copy number of the *UBQLN1-3* genes in different solid tumors in the TCGA database**

Distributions of DNA copy number for *UBQLN1* (A), *UBQLN2* (B), and *UBQLN3* (C) genes in different cancer types. Tumor types were sorted by the median value of copy number in individual cancer types.

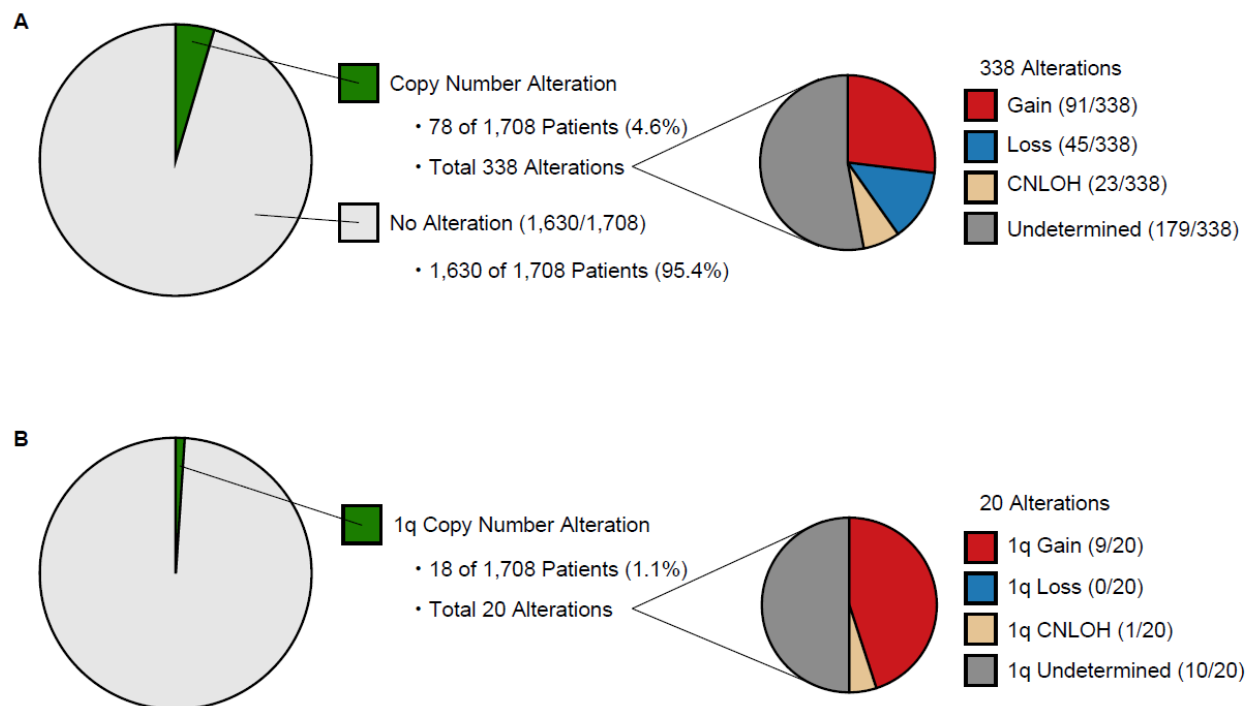

**Figure S6. Copy number alterations in adjacent normal tissues in TCGA dataset**

**A.** Pie chart showing the percentage of overall copy number alterations in adjacent normal tissues in TCGA (Left,  $n = 1,708$  patients) and the percentage of each type of alterations (Right,  $n = 338$  alterations). **B.** Pie chart showing the percentage of chromosome 1q copy number alterations in adjacent normal tissues in TCGA (Left,  $n = 1,708$  patients) and the percentage of each type of alterations (Right,  $n = 20$  alterations). CNLOH: copy neutral loss of heterozygosity.

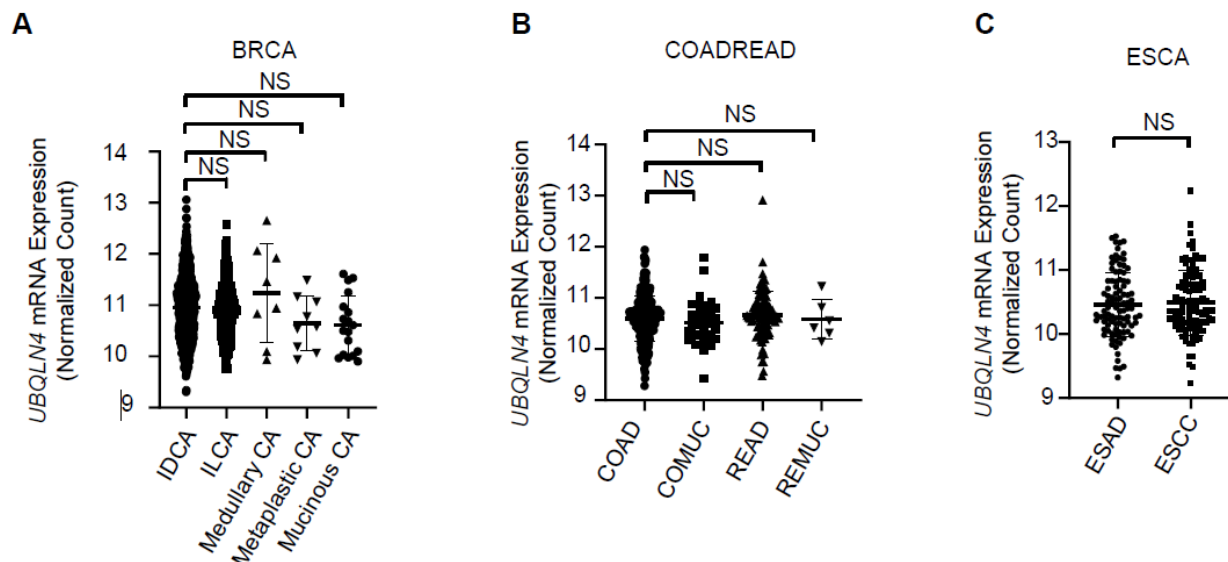

**Figure S7. *UBQLN4* mRNA levels in relation to histopathology subtypes in different cancer types**

**A-C.** *UBQLN4* mRNA levels in different histopathology subtypes in different cancer types in TCGA datasets BRCA (A), COAD/READ (B), ESCA (C). COAD: Colon Adenocarcinoma, COMUC: Colon Mucinous Adenocarcinoma, ESAD: Esophageal Adenocarcinoma, ESCC: Esophageal Squamous Cell Carcinoma, READ: Rectal Adenocarcinoma, REMUC: Rectal Mucinous Adenocarcinoma, IDCA: Infiltrating Ductal Carcinoma, ILCA: Infiltrating Lobular Carcinoma, NS; not significant.

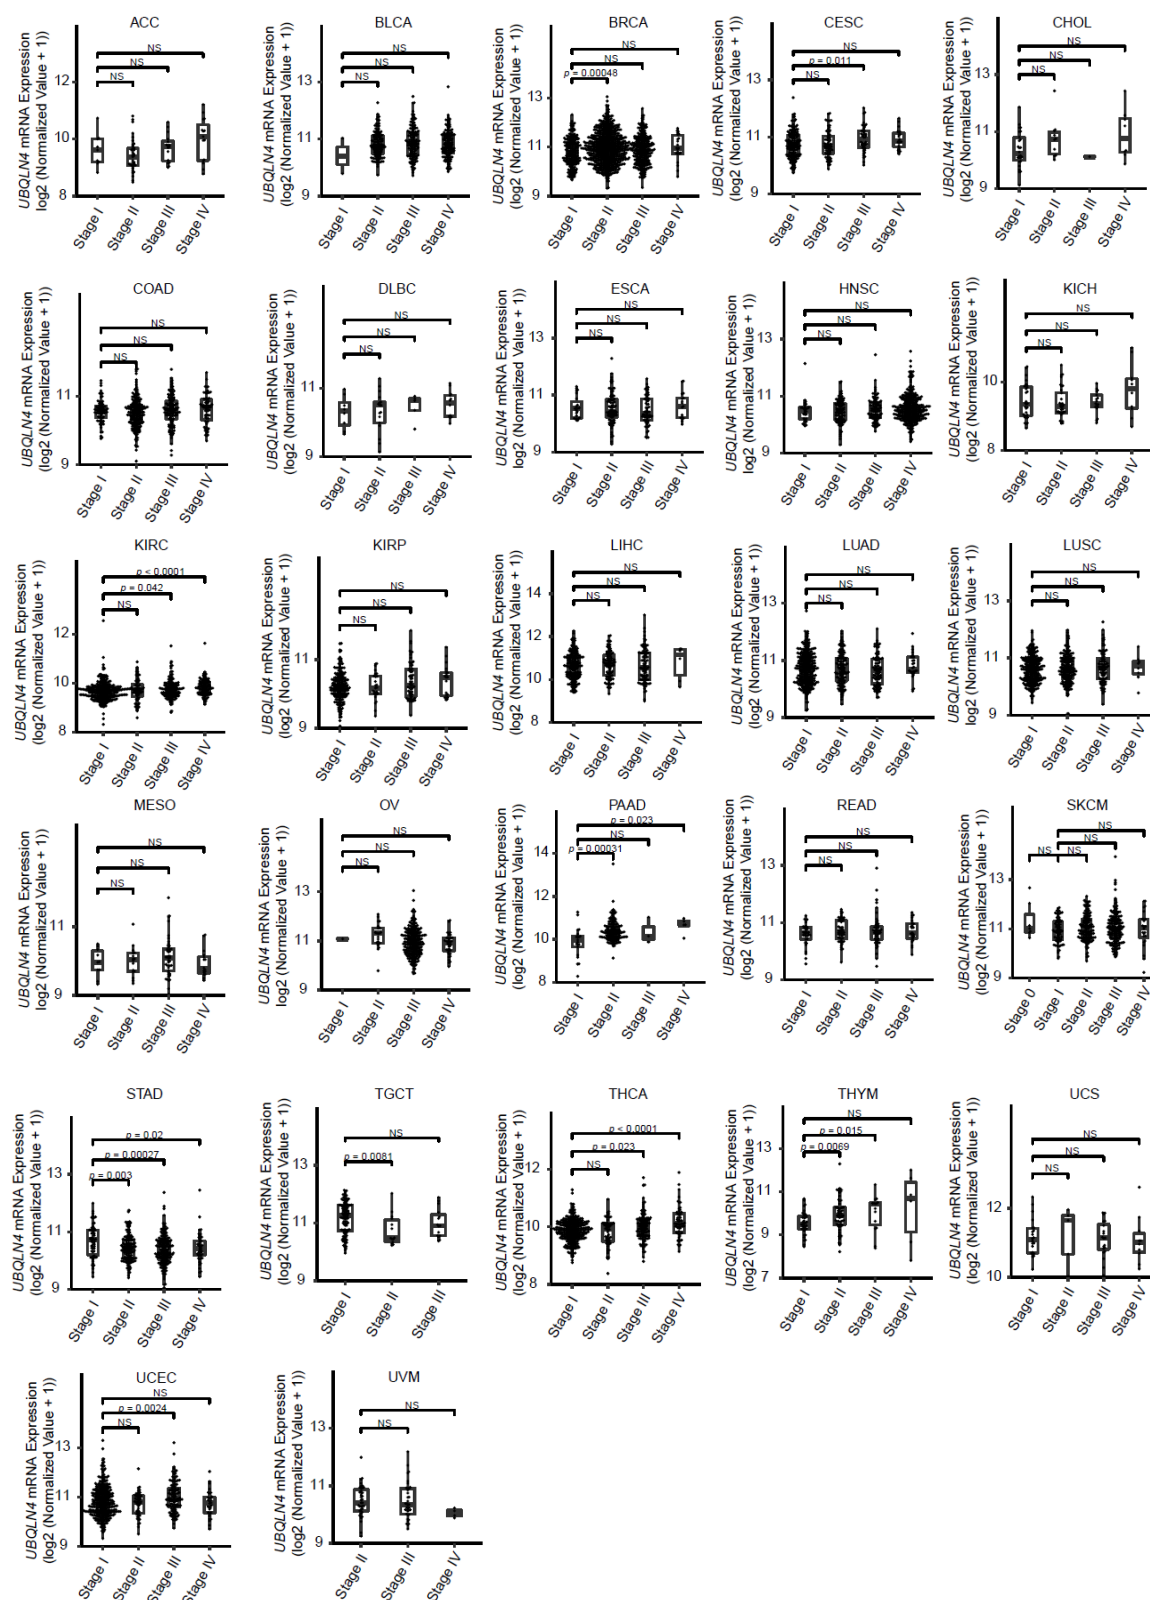

Figure S8. *UBQLN4* mRNA levels in relation to AJCC stage in different cancer types.

*UBQLN4* mRNA levels in cancer patients diagnosed with different stages in the TCGA datasets. ACC: Adrenocortical Carcinoma, BLCA: Bladder Urothelial Carcinoma, BRCA: Breast Invasive Carcinoma, CESC: Cervical Squamous Cell Carcinoma and Endocervical Adenocarcinoma, CHOL: Cholangiocarcinoma, COAD: Colon Adenocarcinoma, DLBC: Lymphoid Neoplasm Diffuse Large B-cell Lymphoma, ESCA: Esophageal Carcinoma, HNSC: Head and Neck Squamous Cell Carcinoma, KICH: Kidney Chromophobe, KIRC: Kidney Renal Clear Cell Carcinoma, KIRP: Kidney Renal Papillary Cell Carcinoma, LIHC: Liver Hepatocellular Carcinoma, LUAD: Lung Adenocarcinoma, LUSC: Lung Squamous Cell Carcinoma, MESO: Mesothelioma, NS: Not Significant, OV: Ovarian Serous Cystadenocarcinoma, PAAD: Pancreatic Adenocarcinoma, READ: Rectal Adenocarcinoma, SKCM: Skin Cutaneous Melanoma, STAD: Stomach Adenocarcinoma, TGCT: Testicular Germ Cell Cancer, THCA: Thyroid Carcinoma, THYM: Thymoma, UCS: Uterine Carcinosarcoma, UCEC: Uterine Corpus Endometrial Carcinoma, UVM: Uveal Melanoma, UCS: Uterine Carcinosarcoma.

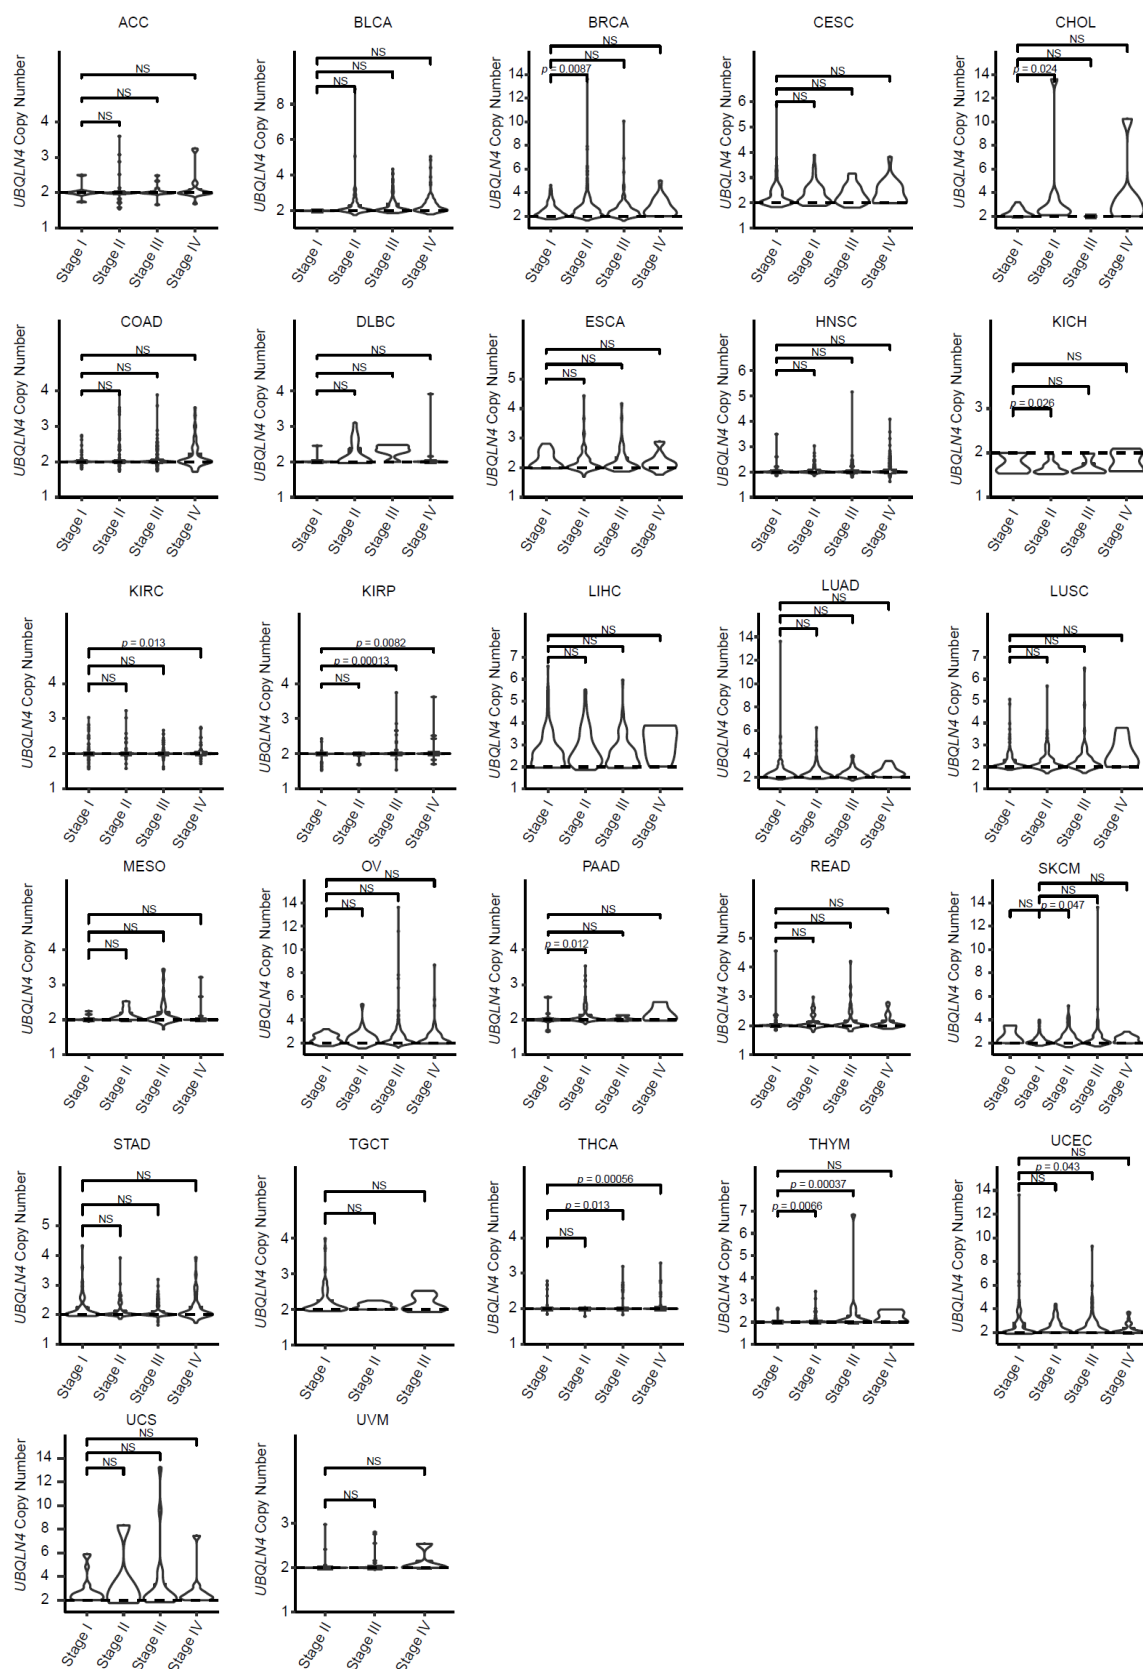

**Figure S9. UBQLN4 DNA copy number in relation to AJCC stages in different cancer types**

*UBQLN4* DNA copy number in different stages in different cancer types in TCGA datasets. ACC: Adrenocortical Carcinoma, BLCA: Bladder Urothelial Carcinoma, BRCA: Breast Invasive Carcinoma, CESC: Cervical Squamous Cell Carcinoma and Endocervical Adenocarcinoma, CHOL: Cholangiocarcinoma, COAD: Colon Adenocarcinoma, DLBC: Lymphoid Neoplasm Diffuse Large B-cell Lymphoma, ESCA: Esophageal Carcinoma, HNSC: Head and Neck Squamous Cell Carcinoma, KICH: Kidney Chromophobe, KIRC: Kidney Renal Clear Cell Carcinoma, KIRP: Kidney Renal Papillary Cell Carcinoma, LIHC: Liver Hepatocellular Carcinoma, LUAD: Lung Adenocarcinoma, LUSC: Lung Squamous Cell Carcinoma, MESO: Mesothelioma, NS: Not Significant, OV: Ovarian Serous Cystadenocarcinoma, PAAD: Pancreatic Adenocarcinoma, READ: Rectal Adenocarcinoma, SKCM: Skin Cutaneous Melanoma, STAD: Stomach Adenocarcinoma, TGCT: Testicular Germ Cell Cancer, THCA: Thyroid Carcinoma, THYM: Thymoma, UCS: Uterine Carcinosarcoma, UCEC: Uterine Corpus Endometrial Carcinoma, UVM: Uveal Melanoma.

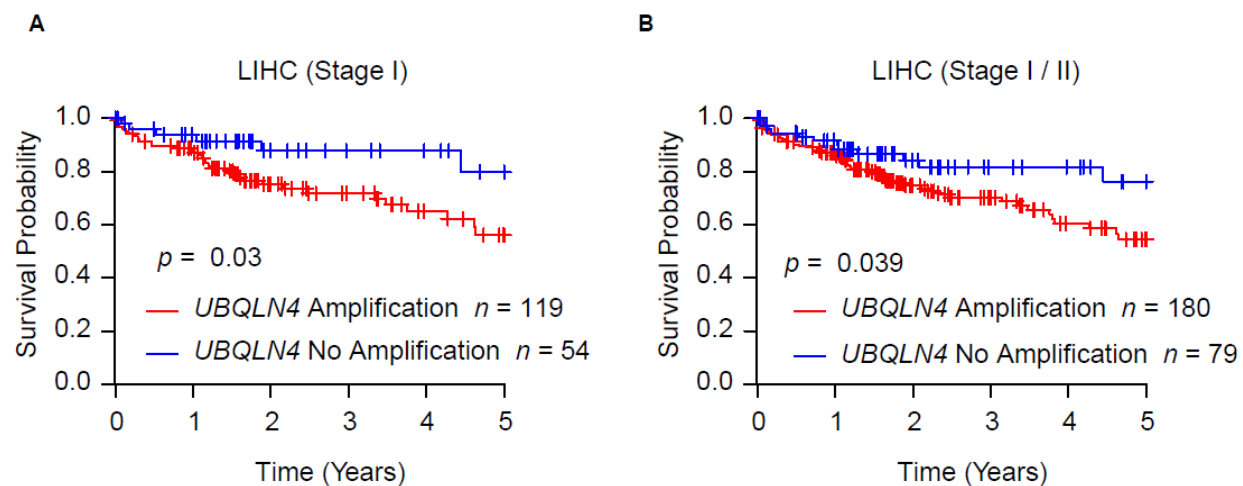

**Figure S10. Survival analysis according to *UBQLN4* DNA copy number in Stage I/II patients**

**A-B.** Kaplan-Meier curves for LIHC patients according to *UBQLN4* DNA copy number in Stage I (**A**) and Stage I/II (**B**) of TCGA datasets. Patients with focal *UBQLN4* copy number values larger than 0.3 were defined as *UBQLN4* gene amplification. LIHC: Liver Hepatocellular Carcinoma.



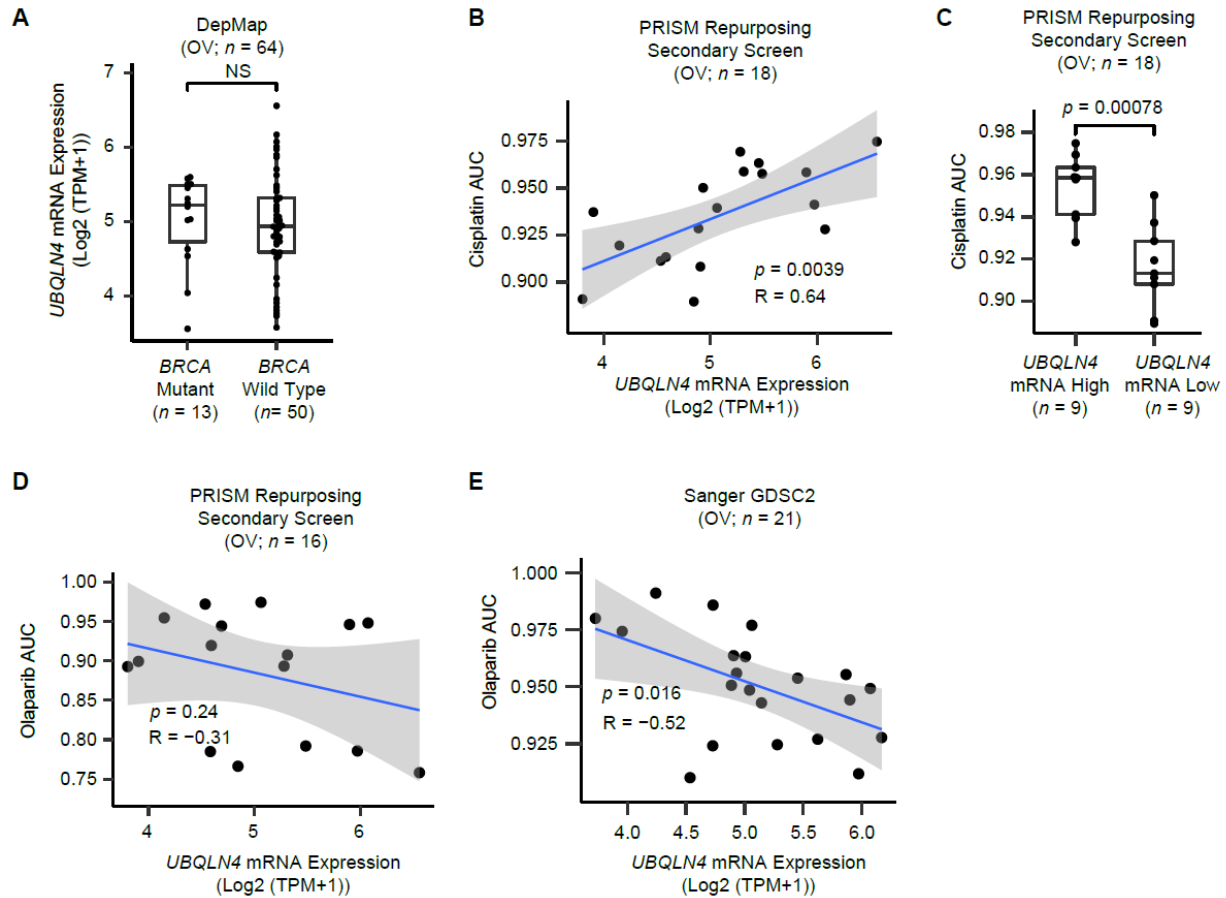

**Figure S11. Associations between *UBQLN4* mRNA levels and Cisplatin and Olaparib responses in *BRCA1/2* wild-type ovarian cancer cell lines**

**A.** Comparison of *UBQLN4* mRNA levels in ovarian cancer (OV) cell lines with BRCA mutant and wild-type in DepMap Portal datasets. Statistical difference was evaluated using the Mann Whitney U test. **B.** Pearson's Correlation between *UBQLN4* mRNA levels and cisplatin AUC values in *BRCA1/2* wild-type OV cell lines in PRISM Repurposing Secondary Screen datasets. **C.** Comparison of cisplatin AUC values in *BRCA1/2* wild-type ovarian cancer (OV) cell lines with low and high *UBQLN4* mRNA levels in PRISM Repurposing Secondary Screen datasets. Statistical difference was evaluated using the Mann Whitney U test. **D.** Pearson's correlation between *UBQLN4* mRNA expression and Olaparib AUC values in *BRCA1/2* wild-type OV cell lines in PRISM Repurposing Secondary Screen datasets. **E.** Comparison of Olaparib AUC values in low and high *UBQLN4* mRNA levels cell lines in *BRCA1/2* wild-type OV in Sanger GDSC2 datasets. Statistical difference was evaluated using the Mann Whitney U test. NS: Not Significant.

**Table S1. Summary of *UBQLN4* analysis using The Cancer Genome Atlas (TCGA) and The Genotype-Tissue Expression (GTEx)**

| TCGA ID | Number of tumors in TCGA | Significant difference between TCGA tumor and GTEx normal (p-value <sup>***</sup> ) | Significant difference between TCGA tumor and adjacent normal (p-value <sup>***</sup> ) | <i>UBQLN4</i> Amplified Samples (%) | <i>UBQLN4</i> Amplification (median CN) | Correlation between <i>UBQLN4</i> mRNA and CN* | OS (p-value <sup>**</sup> ) | OS Stage 3 & 4 samples (p-value <sup>**</sup> ) |
|---------|--------------------------|-------------------------------------------------------------------------------------|-----------------------------------------------------------------------------------------|-------------------------------------|-----------------------------------------|------------------------------------------------|-----------------------------|-------------------------------------------------|
| ACC     | 79                       | N/A                                                                                 | N/A                                                                                     | 10.98                               | N (2.00)                                | 0.61                                           | 0.0072                      | 0.0055                                          |
| BLCA    | 403                      | Y (= 0.024)                                                                         | Y (< 0.0001)                                                                            | 33.41                               | N (2.08)                                | 0.58                                           | 0.12                        | 0.14                                            |
| BRCA    | 1081                     | Y (< 0.0001)                                                                        | Y (< 0.0001)                                                                            | 62.86                               | Y, High (2.82)                          | 0.66                                           | 0.014                       | 0.062                                           |
| CESC    | 293                      | N/A                                                                                 | Y (= 0.021)                                                                             | 42.72                               | Y, Moderate (2.25)                      | 0.63                                           | 0.017                       | 0.28                                            |
| CHOL    | 36                       | N/A                                                                                 | Y (< 0.0001)                                                                            | 61.11                               | Y, High (2.71)                          | 0.83                                           | 0.19                        | N/A                                             |
| COAD    | 447                      | Y (< 0.0001)                                                                        | Y (< 0.0001)                                                                            | 14.78                               | N (2.01)                                | 0.61                                           | 0.033                       | 0.14                                            |
| DLBC    | 47                       | N/A                                                                                 | N/A                                                                                     | 22.92                               | N (2.01)                                | 0.54                                           | 0.037                       | 0.25                                            |
| ESCA    | 184                      | Y (< 0.0001)                                                                        | Y (= 0.014)                                                                             | 30.65                               | Y, Moderate (2.12)                      | 0.64                                           | 0.18                        | 0.1                                             |
| GBM     | 166                      | N (< 0.0001)                                                                        | N (= 0.32)                                                                              | 12.50                               | N (2.01)                                | 0.28                                           | 0.0027                      | N/A                                             |
| HNSC    | 521                      | N/A                                                                                 | N (= 0.66)                                                                              | 14.52                               | N (2.01)                                | 0.58                                           | 0.016                       | 0.008                                           |
| KICH    | 65                       | N (< 0.0001)                                                                        | N (< 0.0001)                                                                            | 0                                   | N (1.22)                                | 0.53                                           | 0.48                        | N/A                                             |
| KIRC    | 530                      | N (< 0.0001)                                                                        | N (< 0.0001)                                                                            | 8.38                                | N (2.00)                                | 0.45                                           | <0.0001                     | <0.0001                                         |
| KIRP    | 288                      | N (= 0.062)                                                                         | Y (< 0.0001)                                                                            | 4.45                                | N (2.00)                                | 0.47                                           | 0.00049                     | 0.088                                           |
| LGG     | 525                      | Y (< 0.0001)                                                                        | N/A                                                                                     | 7.50                                | N (2.01)                                | 0.13                                           | <0.0001                     | N/A                                             |
| LIHC    | 367                      | Y (< 0.0001)                                                                        | Y (< 0.0001)                                                                            | 67.28                               | Y, High (3.12)                          | 0.63                                           | 0.0040                      | 0.056                                           |
| LUAD    | 494                      | Y (< 0.0001)                                                                        | Y (< 0.0001)                                                                            | 53.55                               | Y, High (2.54)                          | 0.69                                           | 0.011                       | 0.15                                            |
| LUSC    | 493                      | Y (< 0.0001)                                                                        | Y (< 0.0001)                                                                            | 35.32                               | Y, Moderate (2.17)                      | 0.6                                            | 0.066                       | 0.28                                            |
| MESO    | 85                       | N/A                                                                                 | N/A                                                                                     | 20.69                               | N (2.01)                                | 0.64                                           | 0.0012                      | 0.031                                           |
| OV      | 307                      | Y (< 0.0001)                                                                        | N/A                                                                                     | 48.83                               | Y, High (2.54)                          | 0.66                                           | 0.19                        | 0.25                                            |

|      |     |              |              |       |                    |      |                      |                      |
|------|-----|--------------|--------------|-------|--------------------|------|----------------------|----------------------|
| PAAD | 178 | N (< 0.0001) | N (= 0.2)    | 19.35 | N (2.02)           | 0.72 | 0.019                | N/A                  |
| PCPG | 184 | N/A          | N (= 0.96)   | 11.96 | N (2.02)           | 0.48 | <0.0001              | N/A                  |
| PRAD | 498 | N (= 0.06)   | Y (< 0.0001) | 4.21  | N (2.00)           | 0.55 | 0.21                 | N/A                  |
| READ | 152 | Y (< 0.0001) | Y (< 0.0001) | 21.56 | N (2.01)           | 0.55 | 0.22                 | 0.35                 |
| SARC | 260 | N/A          | N/A          | 27.55 | N (2.04)           | 0.64 | <0.0001              | N/A                  |
| SKCM | 458 | Y (< 0.0001) | N/A          | 33.33 | Y, Moderate (2.24) | 0.67 | <0.0001              | 0.00082              |
| STAD | 386 | Y (< 0.0001) | Y (< 0.0001) | 22.12 | N (2.02)           | 0.58 | <0.0001 <sup>#</sup> | 0.00047 <sup>#</sup> |
| TGCT | 139 | Y (< 0.0001) | N/A          | 23.74 | Y, Moderate (2.10) | 0.19 | 0.65                 | 0.097                |
| THCA | 512 | N/A          | Y (< 0.0001) | 4.66  | N (2.00)           | 0.43 | 0.00055              | 0.048                |
| THYM | 119 | N/A          | N/A          | 14.15 | N (2.00)           | 0.50 | 0.10                 | N/A                  |
| UCEC | 530 | Y (< 0.0001) | Y (< 0.0001) | 42.15 | Y, Moderate (2.12) | 0.64 | <0.0001              | 0.0016               |
| UCS  | 55  | Y (< 0.0001) | N/A          | 59.65 | Y, High (2.82)     | 0.77 | 0.053                | 0.0069               |
| UVM  | 80  | N/A          | N/A          | 5.29  | N (2.00)           | 0.26 | <0.0001 <sup>#</sup> | <0.0001 <sup>#</sup> |

ACC: Adrenocortical Carcinoma, BLCA: Bladder Urothelial Carcinoma, BRCA: Breast Invasive Carcinoma, CESC: Cervical Squamous Cell Carcinoma and Endocervical Adenocarcinoma, CHOL: Cholangiocarcinoma, CN: copy number, COAD: Colon Adenocarcinoma, DLBC: Lymphoid Neoplasm Diffuse Large B-cell Lymphoma, ESCA: Esophageal Carcinoma, GBM: Glioblastoma Multiforme, GTEx: The Genotype-Tissue Expression, HNSC: Head and Neck Squamous Cell Carcinoma, KICH: Kidney Chromophobe, KIRC: Kidney Renal Clear Cell Carcinoma, KIRP: Kidney Renal Papillary Cell Carcinoma, LGG: Low Grade Glioma, LIHC: Liver Hepatocellular Carcinoma, LUAD: Lung Adenocarcinoma, LUSC: Lung Squamous Cell Carcinoma, MESO: Mesothelioma, N: No, N/A: not available, , OS: overall survival, OV: Ovarian Serous Cystadenocarcinoma, PAAD: Pancreatic Adenocarcinoma, PCPG: Pheochromocytoma and Paraganglioma, PRAD: prostate Adenocarcinoma, READ: Rectal

Adenocarcinoma, SARC: Sarcoma, SKCM: Skin Cutaneous Melanoma, STAD: Stomach Adenocarcinoma, TCGA: The Cancer Genome Atlas, TGCT: Testicular Germ Cell Cancer, THCA: Thyroid Carcinoma, THYM: Thymoma, UCEC: Uterine Corpus Endometrial Carcinoma, UCS: Uterine Carcinosarcoma, UVM: Uveal Melanoma. Y: Yes, \*: Correlation coefficient calculated by Pearson correlation test, \*\*:  $p$  value calculated by log-rank test, \*\*\*:  $p$  value calculated by Mann U-Whitney test. #: All these  $p$  -values are associated with OS in patients with low *UBQLN4* mRNA expression.
